# Supplementary material for: Coinage metalides: a new class of excess electron compounds with high stability and large nonlinear optical responses
Source: Royal Society of Chemistry journal article supplement (doi:10.1039/c9cp06894e), 2020-01-01
Supplement: c9cp06894e1.pdf [file c9cp06894e1.pdf]

The electronic supplementary information for

**Coinage metalides: a new type of excess electron compounds with  
high stability and large nonlinear optical responses**

Xiang-Hui Li<sup>b</sup>, Xiao-Ling Zhang<sup>a</sup>, Qiao-Hong Chen<sup>a</sup>, Li Zhang<sup>a</sup>, Jing-Hua Chen<sup>a</sup>,  
Wei-Ming Sun<sup>\*a</sup>, Di Wu<sup>c</sup>, Zhi-Ru Li<sup>c</sup>

*<sup>a</sup>Fujian Key Laboratory of Drug Target Discovery and Structural and Functional Research, The  
School of Pharmacy, Fujian Medical University, Fuzhou 350108, People's Republic of China.*

*E-mail address: [sunwm@fjmu.edu.cn](mailto:sunwm@fjmu.edu.cn)*

*<sup>b</sup>Medical Technology and Engineering College, Fujian Medical University, Fuzhou 350004, Fujian,  
People's Republic of China*

*<sup>c</sup>Laboratory of Theoretical and Computational Chemistry, Institute of Theoretical Chemistry, Jilin  
University, Changchun 130023, People's Republic of China.*

## Table of Contents

|                                                                                                                                                                                                                                       |            |
|---------------------------------------------------------------------------------------------------------------------------------------------------------------------------------------------------------------------------------------|------------|
| <b>1. Tables</b> .....                                                                                                                                                                                                                | <b>S3</b>  |
| <b>Table S1.</b> The geometric parameters of $\text{Li}^+\text{-1-Cu}^-$ optimized by using the same LANL2DZ basis set for Cu and different basis sets for Li, C, H, and F atoms .....                                                | <b>S3</b>  |
| <b>Table S2.</b> The geometric parameters of $\text{Li}^+\text{-1-Cu}^-$ optimized by using the same 6-31+G(d, p) basis set for Li, C, H, and F atoms and different Basis Sets for Cu atom.....                                       | <b>S4</b>  |
| <b>Table S3.</b> The dipole moments, polarizabilities, and first hyperpolarizabilities of $\text{Li}^+\text{-1-Cu}^-$ calculated by the same LANL2DZ basis set for Cu and different basis sets for Li, C, H, and F atoms.....         | <b>S5</b>  |
| <b>Table S4.</b> The dipole moments, polarizabilities, and first hyperpolarizabilities of $\text{Li}^+\text{-1-Cu}^-$ calculated by the same 6-31+G(d) basis set for Li, C, H, and F atoms and different basis sets for Cu atom ..... | <b>S6</b>  |
| <b>2. Figures</b> .....                                                                                                                                                                                                               | <b>S7</b>  |
| <b>Fig. S1</b> The optimized equilibrium structure of the <b>1</b> molecule.....                                                                                                                                                      | <b>S7</b>  |
| <b>Fig. S2.</b> Isosurface maps of $\alpha_{zz}$ density $-z\rho_z(\mathbf{r})$ for $\text{M}^+\text{-1-M}^-$ Au) .....                                                                                                               | <b>S8</b>  |
| <b>Fig. S3.</b> The ultraviolet-visible-infrared absorption spectra of $\text{M}^+\text{-1-M}^-$ .....                                                                                                                                | <b>S9</b>  |
| <b>3. Cartesian coordinates</b> .....                                                                                                                                                                                                 | <b>S10</b> |

## 1. Tables

**Table S1** The symmetry, the distance between Li<sup>+</sup> and Cu<sup>-</sup> ( $d_{\text{Li-Cu}}$ , in Å), Li<sup>+</sup>-F distance ( $d_{\text{Li-F}}$ , in Å), and distance between Cu<sup>-</sup> and H ( $d_{\text{Cu-H}}$ , in Å) for Li<sup>+</sup>-**1**-Cu<sup>-</sup> optimized by using the same LANL2DZ basis set for Cu and different basis sets for Li, C, H, and F atoms.

| Basis sets                | Symmetry                   | $d_{\text{Li-Cu}}$ | $d_{\text{Li-F}}$ | $d_{\text{Cu-H}}$ |
|---------------------------|----------------------------|--------------------|-------------------|-------------------|
| 6-31G                     | $C_{3v}$                   | 6.150              | 1.826             | 2.518             |
| 6-31G(d)                  | $C_{3v}$                   | 6.124              | 1.821             | 2.597             |
| 6-31+G(d)                 | $C_{3v}$                   | 6.162              | 1.844             | 2.591             |
| <b>6-31+G(d, p)</b>       | <b><math>C_{3v}</math></b> | <b>6.147</b>       | <b>1.847</b>      | <b>2.574</b>      |
| 6-31++G(d, p)             | $C_{3v}$                   | 6.147              | 1.848             | 2.575             |
| 6-311+G(d)                | $C_{3v}$                   | 6.189              | 1.854             | 2.588             |
| 6-311+G(d, p)             | $C_{3v}$                   | 6.182              | 1.852             | 2.583             |
| 6-311++G(d, p)            | $C_{3v}$                   | 6.185              | 1.852             | 2.586             |
| 6-311++G(2d, 2p)          | $C_{3v}$                   | 6.151              | 1.843             | 2.583             |
| <b>6-311++G(3df, 3pd)</b> | <b><math>C_{3v}</math></b> | <b>6.128</b>       | <b>1.842</b>      | <b>2.572</b>      |

**Table S2** The symmetry, the distance between Li<sup>+</sup> and Cu<sup>-</sup> ( $d_{\text{Li-Cu}}$ , in Å), Li<sup>+</sup>-F distance ( $d_{\text{Li-F}}$ , in Å), and distance between Cu<sup>-</sup> and H ( $d_{\text{Cu-H}}$ , in Å) for Li<sup>+</sup>-**1**-Cu<sup>-</sup> optimized by using the same 6-31+G(d, p) basis set for Li, C, H, and F atoms and different basis sets for Cu atom.

| Basis sets            | Symmetry                   | $d_{\text{Li-Li}}$ | $d_{\text{Li-F}}$ | $d_{\text{Cu-H}}$ |
|-----------------------|----------------------------|--------------------|-------------------|-------------------|
| LANL2DZ               | $C_{3v}$                   | 6.176              | 1.847             | 2.602             |
| SDD                   | $C_{3v}$                   | 6.176              | 1.847             | 2.602             |
| Def2-TZVP             | $C_{3v}$                   | 6.217              | 1.846             | 2.638             |
| <b>aug-cc-pVDZ-pp</b> | <b><math>C_{3v}</math></b> | <b>6.192</b>       | <b>1.847</b>      | <b>2.615</b>      |
| aug-cc-pVTZ-pp        | $C_{3v}$                   | 6.206              | 1.847             | 2.626             |
| <b>aug-cc-pVQZ-pp</b> | <b><math>C_{3v}</math></b> | <b>6.197</b>       | <b>1.846</b>      | <b>2.621</b>      |

**Table S3** The dipole moments ( $\mu_0$ , in au), polarizabilities ( $\alpha_0$ , in au), first hyperpolarizabilities ( $\beta_0$ , in au) of  $\text{Li}^+ \text{-1-Cu}^-$  calculated by using the same LANL2DZ basis set for Cu and different basis sets for Li, C, H, and F atoms.

| Basis sets                | $\mu_0$      | $\alpha_0$ | $\beta_0$    |
|---------------------------|--------------|------------|--------------|
| 6-31G                     | 4.210        | 191        | 10477        |
| 6-31G(d)                  | 4.731        | 204        | 16291        |
| <b>6-31+G(d)</b>          | <b>4.474</b> | <b>203</b> | <b>16762</b> |
| 6-31+G(d, p)              | 4.467        | 203        | 16245        |
| 6-31++G(d, p)             | 4.458        | 203        | 16419        |
| 6-311+G(d, p)             | 4.375        | 202        | 15772        |
| 6-311++G(d, p)            | 4.373        | 201        | 15315        |
| 6-311++G(2d, 2p)          | 4.478        | 204        | 16379        |
| <b>6-311++G(3df, 3pd)</b> | <b>4.515</b> | <b>205</b> | <b>16619</b> |

**Table S4** The dipole moments ( $\mu_0$ , in au), polarizabilities ( $\alpha_0$ , in au), first hyperpolarizabilities ( $\beta_0$ , in au) of  $\text{Li}^+\text{-1-Cu}^-$  calculated by using the same 6-31+G(d) basis set for Li, C, H, and F atoms and different basis sets for Cu atom.

| Basis sets            | $d_{\text{Li-Li}}$ | $d_{\text{Li-F}}$ | $d_{\text{Li-H}}$ |
|-----------------------|--------------------|-------------------|-------------------|
| LANL2DZ               | 4.499              | 211               | 20744             |
| SDD                   | 4.522              | 202               | 15832             |
| Def2-TZVP             | 4.426              | 202               | 23078             |
| aug-cc-pVDZ-pp        | 4.515              | 205               | 16619             |
| <b>aug-cc-pVTZ-pp</b> | <b>4.466</b>       | <b>213</b>        | <b>11858</b>      |
| <b>aug-cc-pVQZ-pp</b> | <b>4.470</b>       | <b>211</b>        | <b>12537</b>      |

## 2. Figures

**Fig. S1** The optimized equilibrium structure of the **1** molecule.

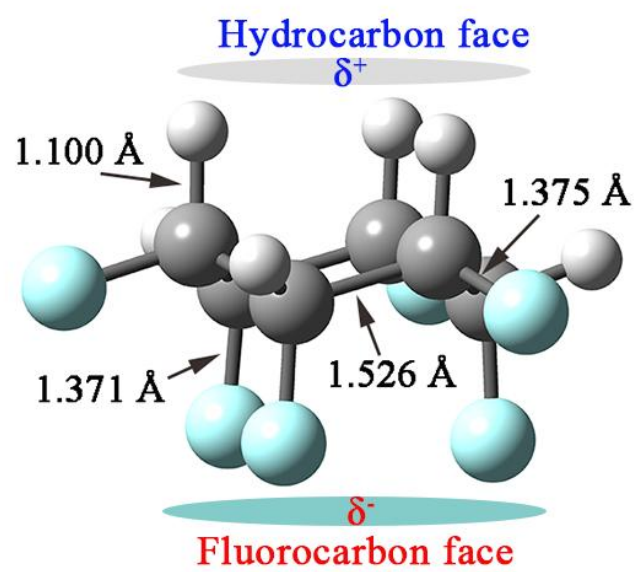

**Fig. S2** Isosurface maps of  $\alpha_{zz}$  density  $-\rho_z(\mathbf{r})$  for  $M^+-1-M'^-$  ( $M = \text{Li, Na, and K}$ ;  $M' = \text{Cu, Ag, and Au}$ ) with the same isovalue of 0.3, where green and blue surfaces denote positive and negative densities, respectively.

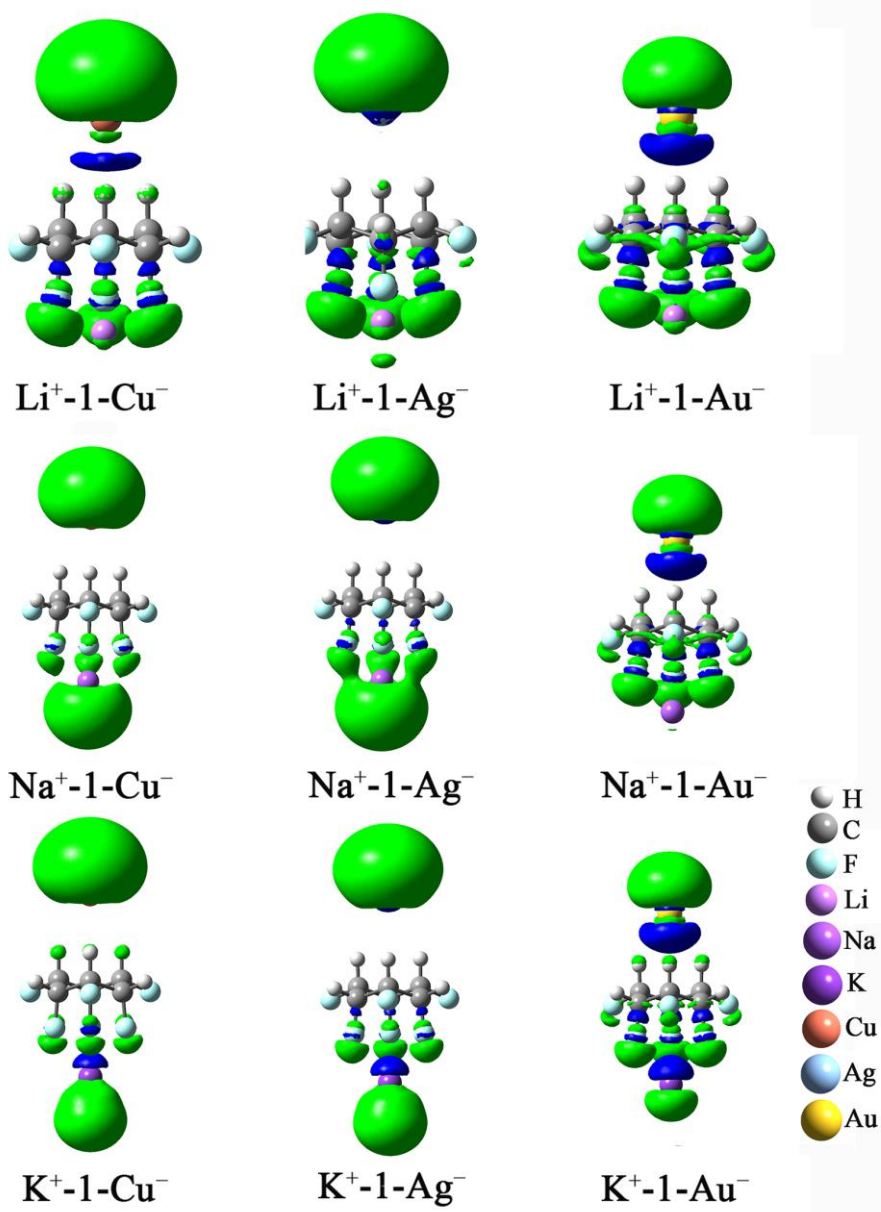



Fig. S3 The ultraviolet-visible-infrared absorption spectra of  $M^+-I-M^-$  ( $M = \text{Li, Na, and K}$ ;  $M' = \text{Cu, Ag, and Au}$ ).

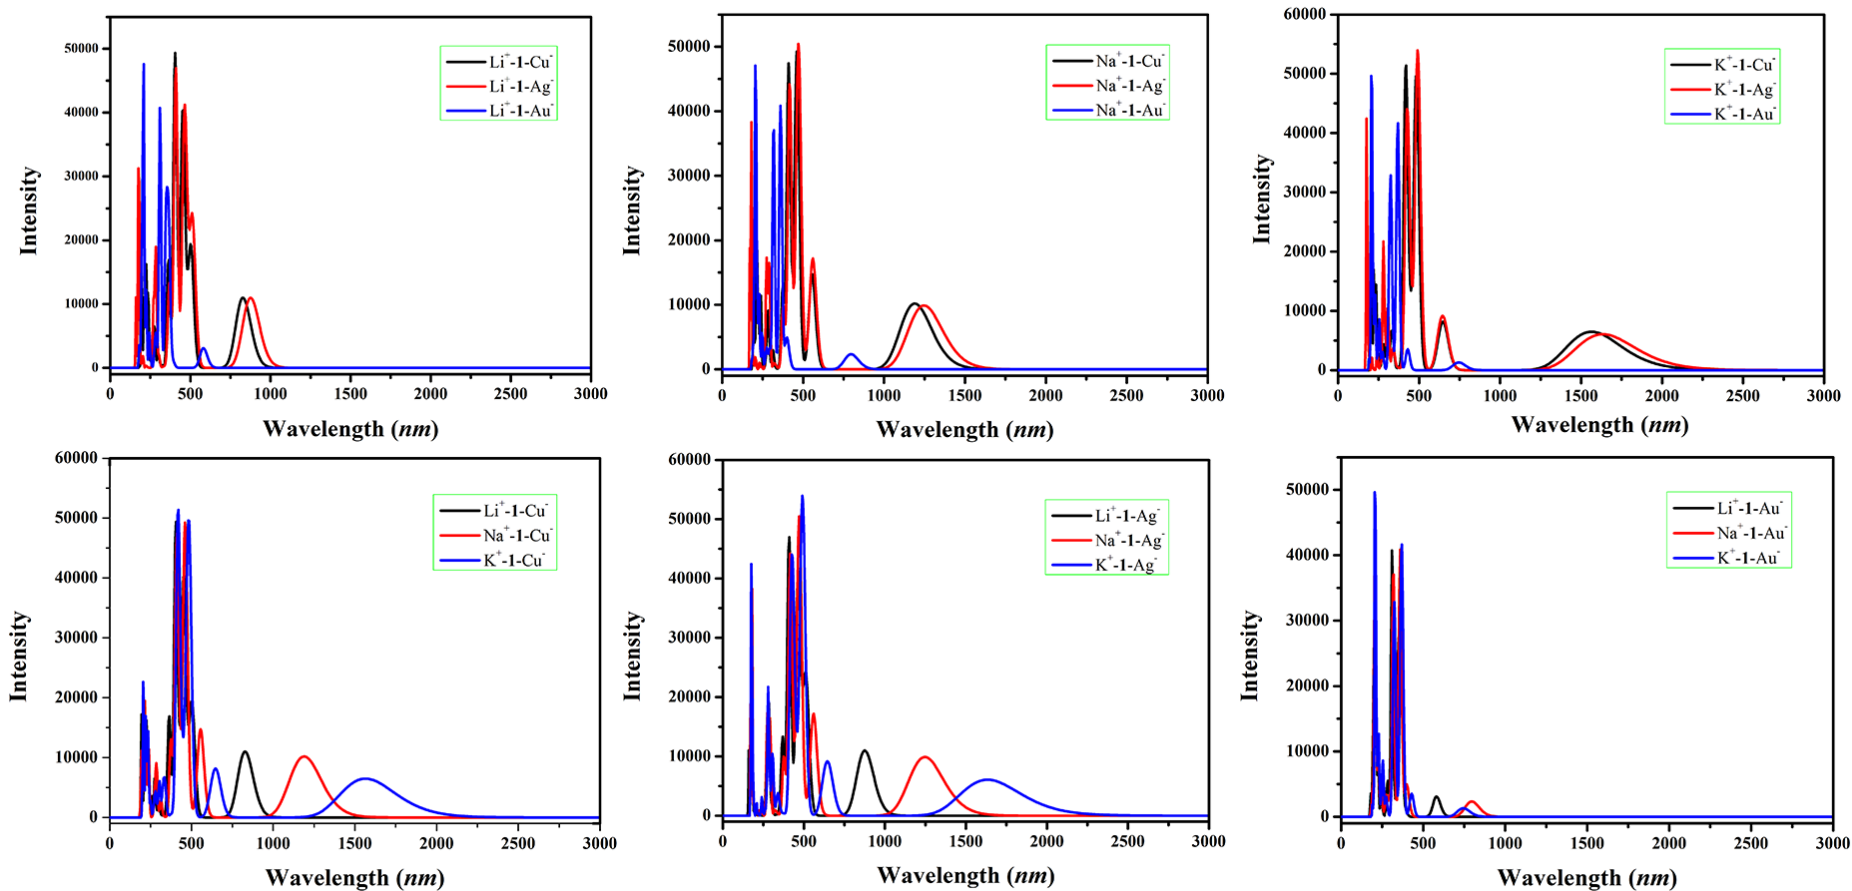

### 3. Cartesian coordinates

#### a. The Cartesian coordinates of Li-1-Cu with $C_{3v}$ symmetry optimized at the M06-2X/6-31+G(d,p)&aug-cc-pVDZ-pp level.

|    |           |           |           |
|----|-----------|-----------|-----------|
| C  | 0.000000  | 1.424600  | -0.156900 |
| C  | 1.260600  | 0.727800  | -0.605800 |
| C  | 1.233700  | -0.712300 | -0.156900 |
| C  | -0.000000 | -1.455600 | -0.605800 |
| C  | -1.233700 | -0.712300 | -0.156900 |
| C  | -1.260600 | 0.727800  | -0.605800 |
| H  | 2.153400  | 1.243300  | -0.245300 |
| H  | 0.000000  | 1.397400  | 0.964900  |
| H  | -0.000000 | -2.486500 | -0.245300 |
| H  | -1.210200 | -0.698700 | 0.964900  |
| H  | -2.153400 | 1.243300  | -0.245300 |
| H  | 1.210200  | -0.698700 | 0.964900  |
| F  | -0.000000 | -1.569400 | -2.042200 |
| F  | 1.359100  | 0.784700  | -2.042200 |
| F  | -1.359100 | 0.784700  | -2.042200 |
| F  | 0.000000  | 2.726100  | -0.600000 |
| F  | -2.360800 | -1.363000 | -0.600000 |
| F  | 2.360800  | -1.363000 | -0.600000 |
| Li | 0.000000  | 0.000000  | -3.015000 |
| Cu | 0.000000  | 0.000000  | 3.170800  |

#### b. The Cartesian coordinates of Li-1-Ag with $C_{3v}$ symmetry optimized at the M06-2X/6-31+G(d,p)&aug-cc-pVDZ-pp level.

|   |           |           |           |
|---|-----------|-----------|-----------|
| C | 0.000000  | 1.429500  | -0.582900 |
| C | 1.261500  | 0.728300  | -1.028700 |
| C | 1.238000  | -0.714700 | -0.582900 |
| C | -0.000000 | -1.456700 | -1.028700 |
| C | -1.238000 | -0.714700 | -0.582900 |
| C | -1.261500 | 0.728300  | -1.028700 |
| H | 2.155000  | 1.244200  | -0.670100 |
| H | 0.000000  | 1.422000  | 0.535300  |
| H | -0.000000 | -2.488400 | -0.670100 |
| H | -1.231500 | -0.711000 | 0.535300  |
| H | -2.155000 | 1.244200  | -0.670100 |
| H | 1.231500  | -0.711000 | 0.535300  |
| F | 0.000000  | -1.565500 | -2.463100 |
| F | 1.355800  | 0.782800  | -2.463100 |
| F | -1.355800 | 0.782800  | -2.463100 |
| F | 0.000000  | 2.723800  | -1.046400 |
| F | -2.358800 | -1.361900 | -1.046400 |
| F | 2.358800  | -1.361900 | -1.046400 |

|    |          |          |           |
|----|----------|----------|-----------|
| Li | 0.000000 | 0.000000 | -3.444600 |
| Ag | 0.000000 | 0.000000 | 2.861800  |

**c. The Cartesian coordinates of Li-1-Au with  $C_{3v}$  symmetry optimized at the M06-2X/6-31+G(d,p)&aug-cc-pVDZ-pp level.**

|    |           |           |           |
|----|-----------|-----------|-----------|
| C  | -0.000000 | 1.440800  | -0.973600 |
| C  | 1.263000  | 0.729200  | -1.411300 |
| C  | 1.247800  | -0.720400 | -0.973600 |
| C  | 0.000000  | -1.458300 | -1.411300 |
| C  | -1.247800 | -0.720400 | -0.973600 |
| C  | -1.263000 | 0.729200  | -1.411300 |
| H  | 2.157600  | 1.245700  | -1.058900 |
| H  | -0.000000 | 1.454100  | 0.138600  |
| H  | 0.000000  | -2.491400 | -1.058900 |
| H  | -1.259300 | -0.727000 | 0.138600  |
| H  | -2.157600 | 1.245700  | -1.058900 |
| H  | 1.259300  | -0.727000 | 0.138600  |
| F  | 0.000000  | -1.557400 | -2.845100 |
| F  | 1.348700  | 0.778700  | -2.845100 |
| F  | -1.348700 | 0.778700  | -2.845100 |
| F  | -0.000000 | 2.719100  | -1.487900 |
| F  | -2.354800 | -1.359600 | -1.487900 |
| F  | 2.354800  | -1.359600 | -1.487900 |
| Li | 0.000000  | 0.000000  | -3.824700 |
| Au | 0.000000  | 0.000000  | 2.204500  |

**d. The Cartesian coordinates of Na-1-Cu with  $C_{3v}$  symmetry optimized at the M06-2X/6-31+G(d,p)&aug-cc-pVDZ-pp level.**

|   |           |           |           |
|---|-----------|-----------|-----------|
| C | -1.235500 | 0.713300  | 0.045300  |
| C | 0.000000  | 1.461900  | -0.397000 |
| C | 1.235500  | 0.713300  | 0.045300  |
| C | 1.266000  | -0.731000 | -0.397000 |
| C | -0.000000 | -1.426600 | 0.045300  |
| C | -1.266000 | -0.731000 | -0.397000 |
| H | 0.000000  | 2.481700  | -0.003300 |
| H | -1.227800 | 0.708900  | 1.162900  |
| H | 2.149200  | -1.240900 | -0.003300 |
| H | -0.000000 | -1.417800 | 1.162900  |
| H | -2.149200 | -1.240900 | -0.003300 |
| H | 1.227800  | 0.708900  | 1.162900  |
| F | 1.392000  | -0.803700 | -1.814400 |
| F | 0.000000  | 1.607300  | -1.814400 |
| F | -1.392000 | -0.803700 | -1.814400 |
| F | -2.360300 | 1.362700  | -0.413900 |

|    |           |           |           |
|----|-----------|-----------|-----------|
| F  | -0.000000 | -2.725400 | -0.413900 |
| F  | 2.360300  | 1.362700  | -0.413900 |
| Na | 0.000000  | 0.000000  | -3.279200 |
| Cu | 0.000000  | 0.000000  | 3.416800  |

**e. The Cartesian coordinates of Na-1-Ag with  $C_{3v}$  symmetry optimized at the M06-2X/6-31+G(d,p)&aug-cc-pVDZ-pp level.**

|    |           |           |           |
|----|-----------|-----------|-----------|
| C  | 0.000000  | 1.430600  | -0.378400 |
| C  | 1.266800  | 0.731400  | -0.817000 |
| C  | 1.238900  | -0.715300 | -0.378400 |
| C  | -0.000000 | -1.462800 | -0.817000 |
| C  | -1.238900 | -0.715300 | -0.378400 |
| C  | -1.266800 | 0.731400  | -0.817000 |
| H  | 2.150400  | 1.241500  | -0.424600 |
| H  | 0.000000  | 1.437500  | 0.736700  |
| H  | -0.000000 | -2.483100 | -0.424600 |
| H  | -1.244900 | -0.718700 | 0.736700  |
| H  | -2.150400 | 1.241500  | -0.424600 |
| H  | 1.244900  | -0.718700 | 0.736700  |
| F  | 0.000000  | -1.605600 | -2.233800 |
| F  | 1.390500  | 0.802800  | -2.233800 |
| F  | -1.390500 | 0.802800  | -2.233800 |
| F  | 0.000000  | 2.723100  | -0.854200 |
| F  | -2.358200 | -1.361500 | -0.854200 |
| F  | 2.358200  | -1.361500 | -0.854200 |
| Na | 0.000000  | 0.000000  | -3.704700 |
| Ag | 0.000000  | 0.000000  | 3.078900  |

**f. The Cartesian coordinates of Na-1-Au with  $C_{3v}$  symmetry optimized at the M06-2X/6-31+G(d,p)&aug-cc-pVDZ-pp level.**

|   |           |           |           |
|---|-----------|-----------|-----------|
| C | -0.000000 | 1.440700  | -0.797600 |
| C | 1.269600  | 0.733000  | -1.226200 |
| C | 1.247700  | -0.720400 | -0.797600 |
| C | 0.000000  | -1.466000 | -1.226200 |
| C | -1.247700 | -0.720400 | -0.797600 |
| C | -1.269600 | 0.733000  | -1.226200 |
| H | 2.152200  | 1.242600  | -0.832600 |
| H | -0.000000 | 1.465600  | 0.312600  |
| H | 0.000000  | -2.485100 | -0.832600 |
| H | -1.269200 | -0.732800 | 0.312600  |
| H | -2.152200 | 1.242600  | -0.832600 |
| H | 1.269200  | -0.732800 | 0.312600  |
| F | 0.000000  | -1.611500 | -2.642900 |
| F | 1.395600  | 0.805800  | -2.642900 |

|    |           |           |           |
|----|-----------|-----------|-----------|
| F  | -1.395600 | 0.805800  | -2.642900 |
| F  | -0.000000 | 2.718700  | -1.318900 |
| F  | -2.354400 | -1.359300 | -1.318900 |
| F  | 2.354400  | -1.359300 | -1.318900 |
| Au | 0.000000  | 0.000000  | 2.405200  |
| Na | 0.000000  | 0.000000  | -4.095700 |

**g. The Cartesian coordinates of K-1-Cu with  $C_{3v}$  symmetry optimized at the M06-2X/6-31+G(d,p)&aug-cc-pVDZ-pp level.**

|    |           |           |           |
|----|-----------|-----------|-----------|
| C  | -1.237400 | 0.714400  | 0.287100  |
| C  | -0.000000 | 1.463600  | -0.153500 |
| C  | 1.237400  | 0.714400  | 0.287100  |
| C  | 1.267500  | -0.731800 | -0.153500 |
| C  | -0.000000 | -1.428800 | 0.287100  |
| C  | -1.267500 | -0.731800 | -0.153500 |
| H  | 0.000000  | 2.479700  | 0.251400  |
| H  | -1.241100 | 0.716500  | 1.401400  |
| H  | 2.147500  | -1.239900 | 0.251400  |
| H  | -0.000000 | -1.433100 | 1.401400  |
| H  | -2.147500 | -1.239900 | 0.251400  |
| H  | 1.241100  | 0.716500  | 1.401400  |
| F  | 1.396800  | -0.806400 | -1.561400 |
| F  | 0.000000  | 1.612900  | -1.561400 |
| F  | -1.396800 | -0.806400 | -1.561400 |
| F  | -2.359300 | 1.362200  | -0.186700 |
| F  | -0.000000 | -2.724300 | -0.186700 |
| F  | 2.359300  | 1.362200  | -0.186700 |
| K  | 0.000000  | 0.000000  | -3.519000 |
| Cu | 0.000000  | 0.000000  | 3.679200  |

**h. The Cartesian coordinates of K-1-Ag with  $C_{3v}$  symmetry optimized at the M06-2X/6-31+G(d,p)&aug-cc-pVDZ-pp level.**

|   |           |           |           |
|---|-----------|-----------|-----------|
| C | 0.000000  | 1.432100  | -0.145800 |
| C | 1.267900  | 0.732000  | -0.583900 |
| C | 1.240200  | -0.716100 | -0.145800 |
| C | -0.000000 | -1.464100 | -0.583900 |
| C | -1.240200 | -0.716100 | -0.145800 |
| C | -1.267900 | 0.732000  | -0.583900 |
| H | 2.148100  | 1.240200  | -0.179800 |
| H | 0.000000  | 1.450200  | 0.966200  |
| H | -0.000000 | -2.480500 | -0.179800 |
| H | -1.255900 | -0.725100 | 0.966200  |
| H | -2.148100 | 1.240200  | -0.179800 |
| H | 1.255900  | -0.725100 | 0.966200  |

|    |           |           |           |
|----|-----------|-----------|-----------|
| F  | 0.000000  | -1.609600 | -1.991200 |
| F  | 1.393900  | 0.804800  | -1.991200 |
| F  | -1.393900 | 0.804800  | -1.991200 |
| F  | 0.000000  | 2.722300  | -0.633200 |
| F  | -2.357600 | -1.361200 | -0.633200 |
| F  | 2.357600  | -1.361200 | -0.633200 |
| K  | 0.000000  | 0.000000  | -3.954400 |
| Ag | 0.000000  | 0.000000  | 3.335500  |

**i. The Cartesian coordinates of K-1-Au with  $C_{3v}$  symmetry optimized at the M06-2X/6-31+G(d,p)&aug-cc-pVDZ-pp level.**

|    |           |           |           |
|----|-----------|-----------|-----------|
| C  | -0.000000 | 1.441100  | -0.590400 |
| C  | 1.270600  | 0.733600  | -1.018500 |
| C  | 1.248000  | -0.720500 | -0.590400 |
| C  | 0.000000  | -1.467200 | -1.018500 |
| C  | -1.248000 | -0.720500 | -0.590400 |
| C  | -1.270600 | 0.733600  | -1.018500 |
| H  | 2.149200  | 1.240900  | -0.611400 |
| H  | -0.000000 | 1.476300  | 0.517300  |
| H  | 0.000000  | -2.481700 | -0.611400 |
| H  | -1.278500 | -0.738100 | 0.517300  |
| H  | -2.149200 | 1.240900  | -0.611400 |
| H  | 1.278500  | -0.738100 | 0.517300  |
| F  | 0.000000  | -1.619500 | -2.425700 |
| F  | 1.402500  | 0.809700  | -2.425700 |
| F  | -1.402500 | 0.809700  | -2.425700 |
| F  | -0.000000 | 2.718300  | -1.118700 |
| F  | -2.354100 | -1.359200 | -1.118700 |
| F  | 2.354100  | -1.359200 | -1.118700 |
| Au | 0.000000  | 0.000000  | 2.630600  |
| K  | 0.000000  | 0.000000  | -4.361900 |
